# Supplementary material
Source: bioRxiv or medRxiv preprint supplement (http://biorxiv.org/highwire/filestream/133573/field_highwire_adjunct_files/5/319723-3.pdf)

**A**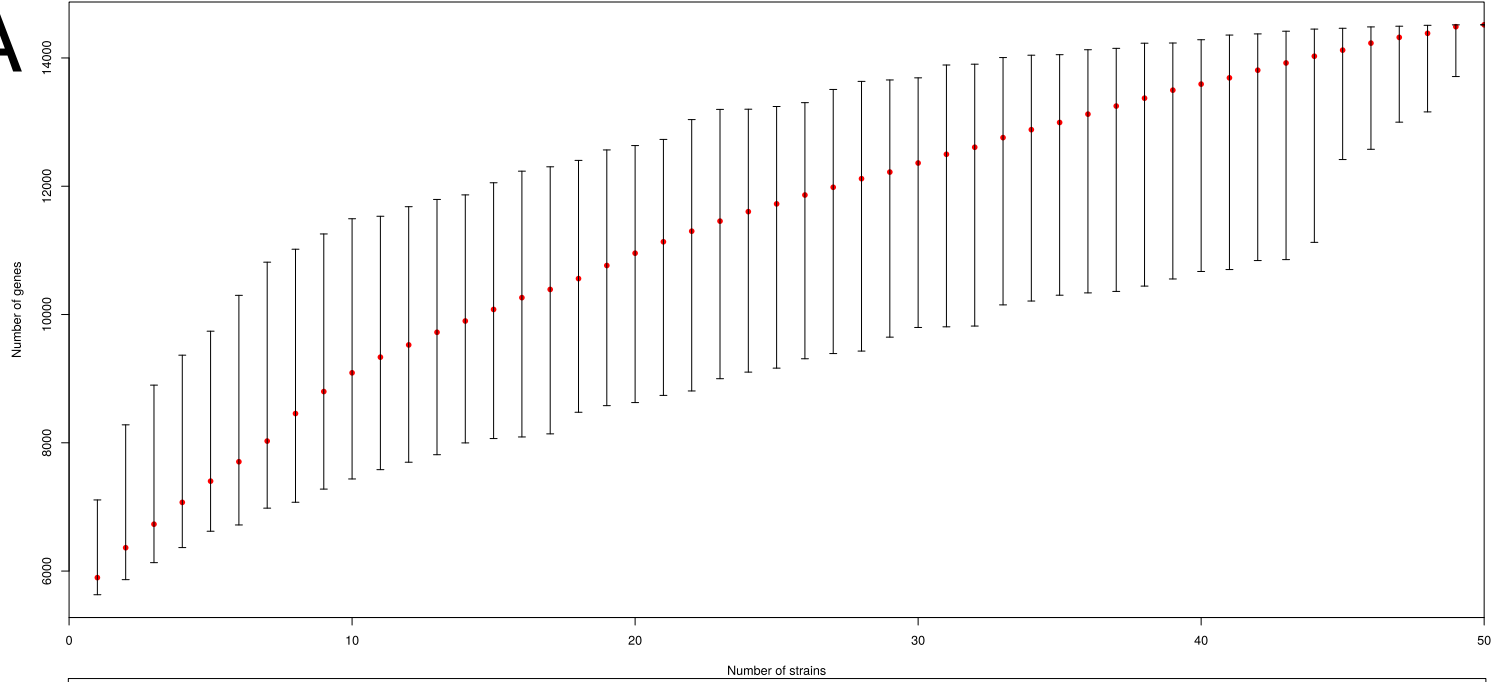**B**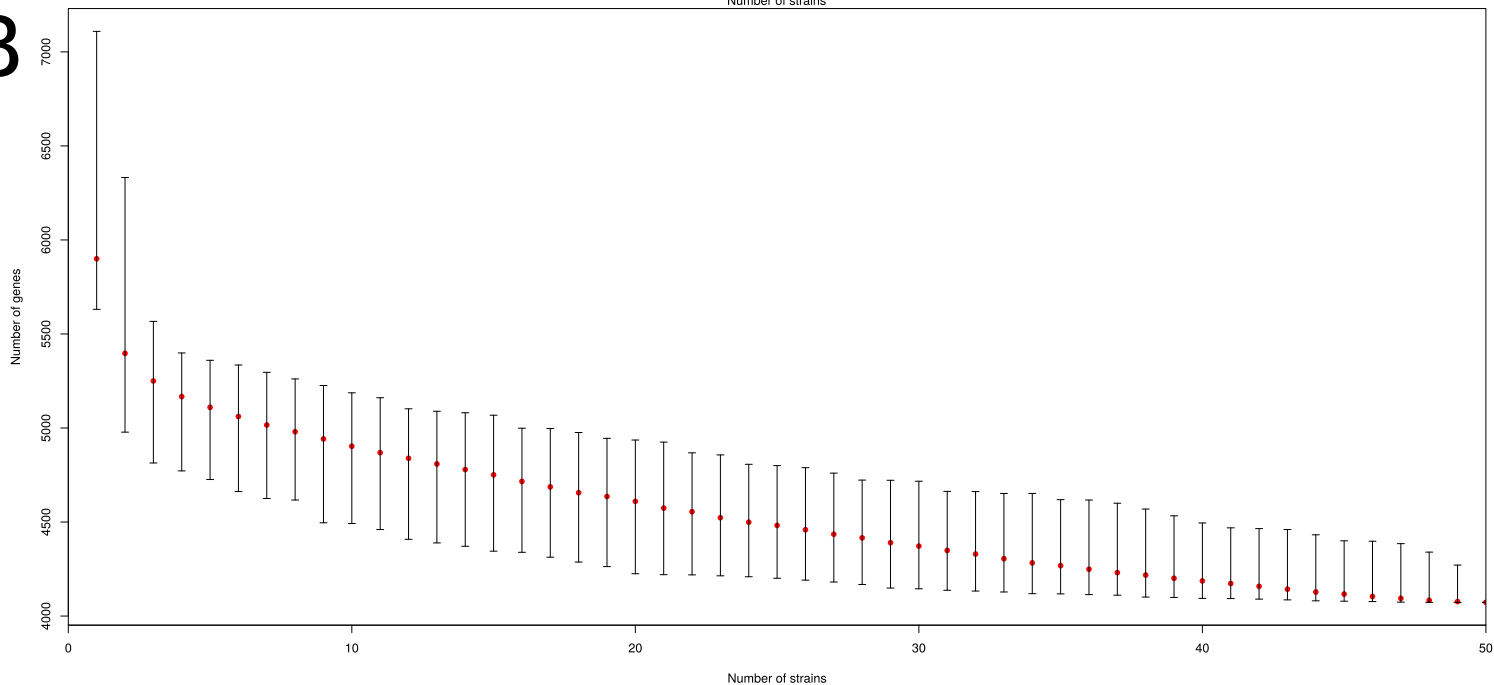

Supplement: Supplementary file [file 319723-3.pdf]
